# Supplementary material for: Increased prescriptions for irritable bowel syndrome after the 2018 Japan Floods: a longitudinal analysis based on the Japanese National Database of Health Insurance Claims and Specific Health Checkups
Source: Springer Nature journal article supplement (doi:10.1186/s12876-022-02342-6), 2022-05-26
Supplement: MOESM1 [file 23084962]

Supplementary Table 1 Demographic Characteristics of Study Subjects

|                         | Victims<br>(n=32,499) | Non-victims<br>(n=5,255,389) | P value |
|-------------------------|-----------------------|------------------------------|---------|
| Prefectures             |                       |                              |         |
| Hiroshima n, (%)        | 8,755 (26.9)          | 2,192,580 (41.7)             | <0.001* |
| Okayama n, (%)          | 15,111 (46.5)         | 1,462,068 (27.8)             |         |
| Ehime n, (%)            | 6,206 (19.1)          | 1,073,717 (20.4)             |         |
| Missing or other n, (%) | 2,427 (7.47)          | 527,024 (10.0)               |         |

We compared prefectures in which study subjects visited any medical institution before and after the disaster between the victim and non-victim group.

\* P value was estimated with the  $\chi^2$  test.

Supplementary Table 2 Estimates of Change in Occurrence of Prescriptions for IBS Drugs Among All Subjects

| Measure of Interest                                                       | Coefficient | Standard error | 95% Confidence interval | P value |
|---------------------------------------------------------------------------|-------------|----------------|-------------------------|---------|
| Pre-disaster trend: non-victims                                           | -0.001      | 0.001          | -0.002 - 0.001          | 0.279   |
| Pre-disaster mean level difference: victims versus non-victims            | 0.090       | 0.010          | 0.069 - 0.110           | < 0.001 |
| Pre-disaster difference in the mean slope: victims versus non-victims     | -0.005      | 0.002          | -0.008 - -0.001         | 0.006   |
| Post-disaster trend: non-victims                                          | 0.007       | 0.006          | -0.005 - 0.018          | 0.271   |
| Difference pre- and post-disaster: non-victims                            | 0.000       | 0.001          | -0.001 - 0.002          | 0.696   |
| Difference in the first month of the disaster: victims versus non-victims | 0.053       | 0.016          | 0.020 - 0.086           | 0.002   |
| Post-disaster difference in the mean slope: victims versus non-victims    | 0.010       | 0.003          | 0.004 - 0.015           | 0.001   |

IBS: irritable bowel syndrome

This was evaluated by a linear regression model with a controlled time series analysis.

Supplementary Table 3 Estimates of Change in Occurrence of Prescriptions for IBS-related Drugs Among Pre-disaster Users

| Variable                                                                  | Coefficient | Standard error | 95% Confidence interval | P value |
|---------------------------------------------------------------------------|-------------|----------------|-------------------------|---------|
| Pre-disaster trend: non-victims                                           | -0.056      | 0.016          | -0.088 - -0.023         | 0.001   |
| Pre-disaster mean level difference: victims versus non-victims            | 4.484       | 1.124          | 2.211 - 6.756           | < 0.001 |
| Pre-disaster difference in the mean slope: victims versus non-victims     | 0.025       | 0.150          | -0.278 - 0.327          | 0.869   |
| Post-disaster trend: non-victims                                          | -2.932      | 0.281          | -3.5 - -2.365           | < 0.001 |
| Difference pre- and post-disaster: non-victims                            | -0.184      | 0.031          | -0.246 - -0.122         | < 0.001 |
| Difference in the first month of the disaster: victims versus non-victims | -0.392      | 1.244          | -2.906 - 2.122          | 0.754   |
| Post-disaster difference in the mean slope: victims versus non-victims    | 0.368       | 0.210          | -0.055 - 0.792          | 0.087   |

IBS: irritable bowel syndrome

This was evaluated by a linear regression model with a controlled time series analysis.
